# Supplementary material
Source: publisher site journal article supplement (https://www.spandidos-publications.com/6111/downloadSupplementary)

Figure S1. Biopsy cytology examination. The image shows scattered necrotic bone and the presence of inflammatory cells (HE staining; magnification, x40).

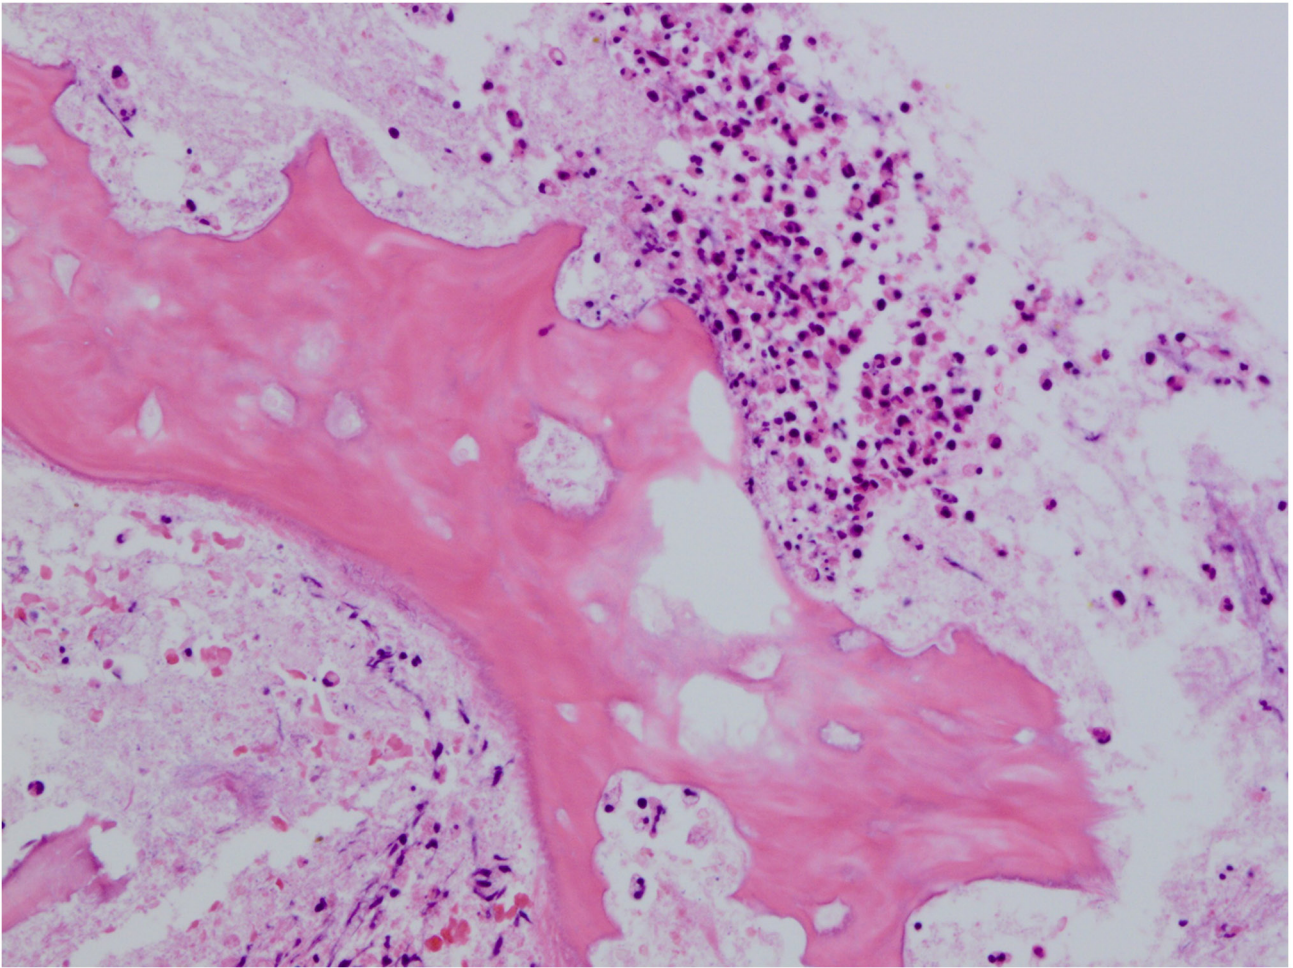

Supplement: Supplementary file 1 [file downloadSupplementary]
